# Supplementary material for: Ferroptosis Inhibition Combats Metabolic Derangements and Improves Cardiac Function in Pulmonary Artery Banded Pigs
Source: PubMed Central journal article supplement (PMC11526868; doi:10.1101/2024.04.24.590907), 2024-10-24

Supplemental Figure 1: Ferrostatin-1 partially mitigated RV insertion site late gadolinium enhancement. (A) Representative cMRI images of LGE. Arrows indicate RV insertion site LGE. (B) Proportion of animals with RV LGE.

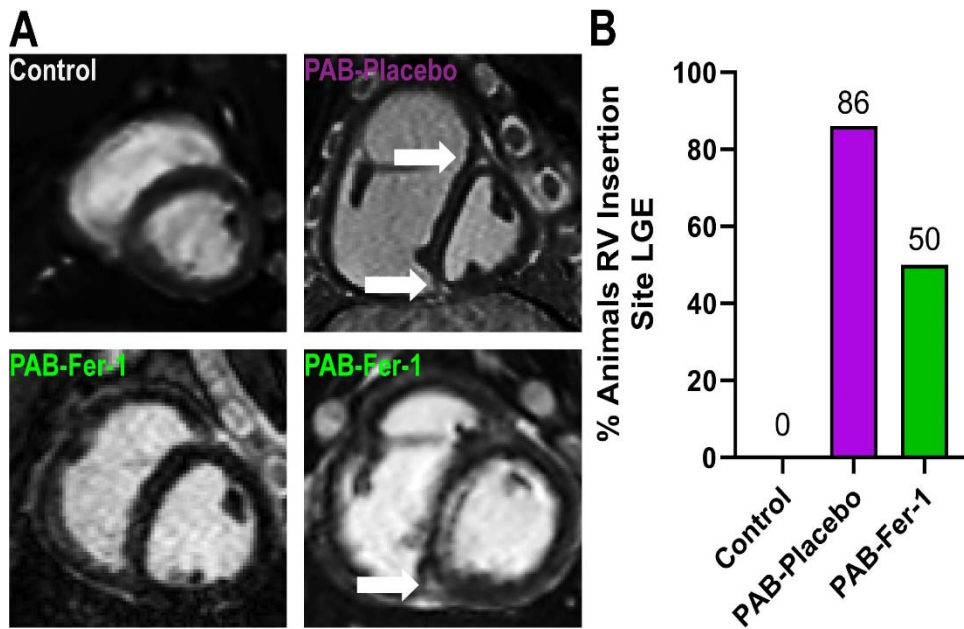

Supplemental Figure 2: Ferrostatin-1 Improved Mitochondrial Cristae Morphology. Representative electron micrographs of RV cardiomyocytes depicting mitochondrial cristae structure. Blinded quantification of mitochondrial cristae morphology. Ferrostatin-1 improved cristae morphology.

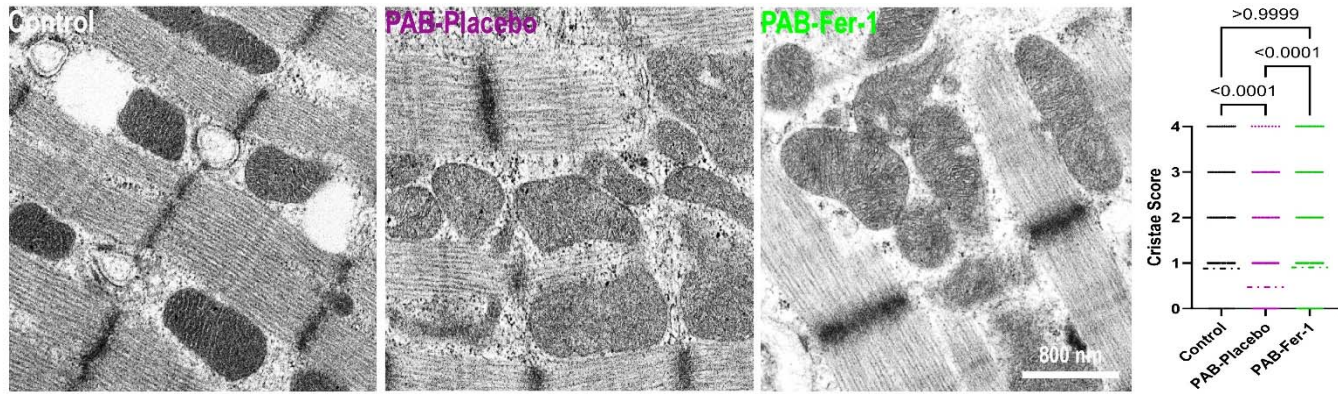

Supplemental Figure 3: Hierarchical cluster analysis of ferroptosis proteins.

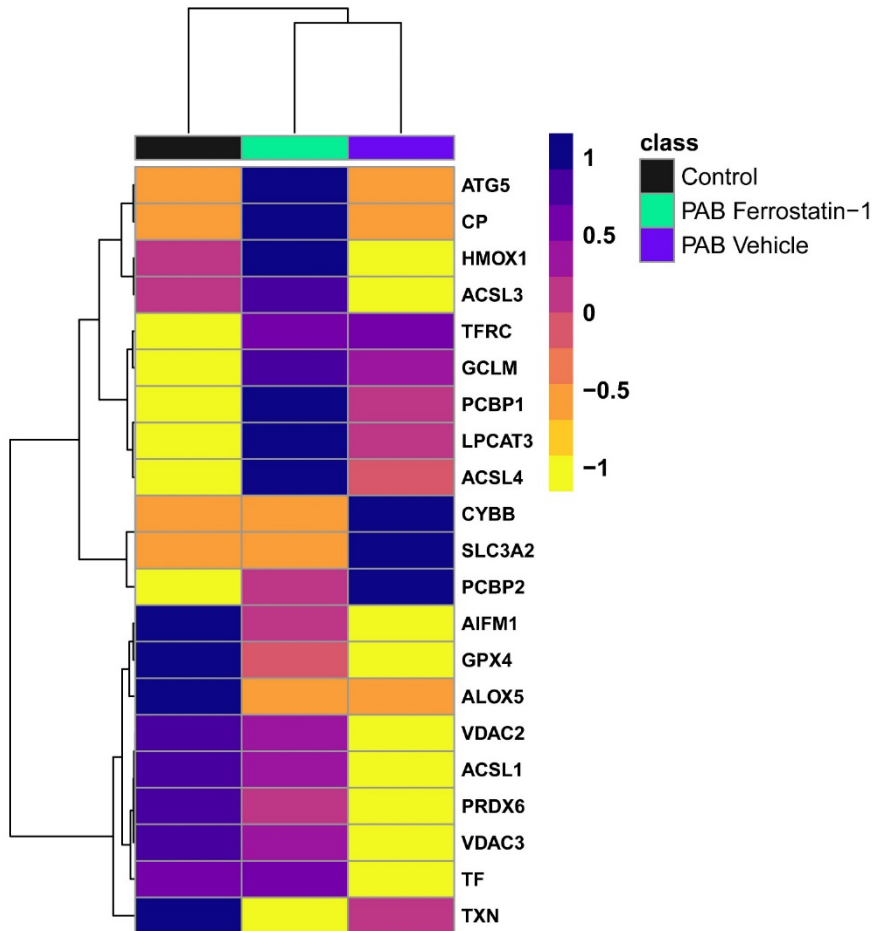

Supplemental Figure 4. Representative confocal micrographs stained with wheat germ agglutinin (purple) and DAPI (blue) staining of RV cross sections and subsequent quantification of cardiomyocyte cross-section area

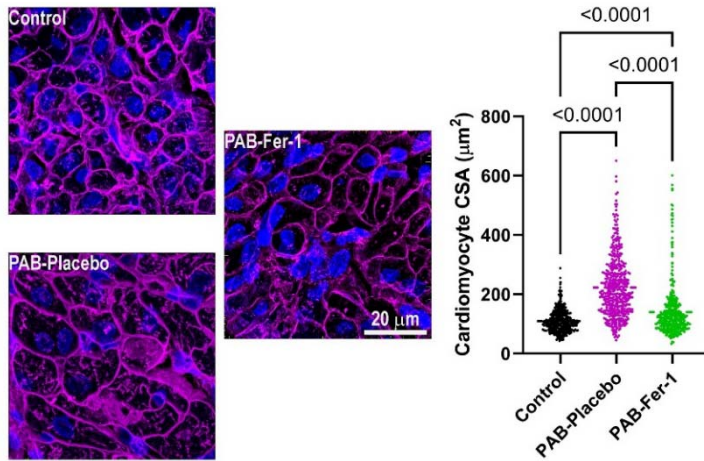

Supplement: NIHPP2024.04.24.590907v2-supplement-2.pdf [file NIHPP2024.04.24.590907v2-supplement-2.pdf]
